# Supplementary material for: Multi-Omics Profiling of Human Endothelial Cells from the Coronary Artery and Internal Thoracic Artery Reveals Molecular but Not Functional Heterogeneity
Source: MDPI journal article supplement (doi:10.3390/ijms241915032), 2023-10-09
Supplement: s1 [file s1]

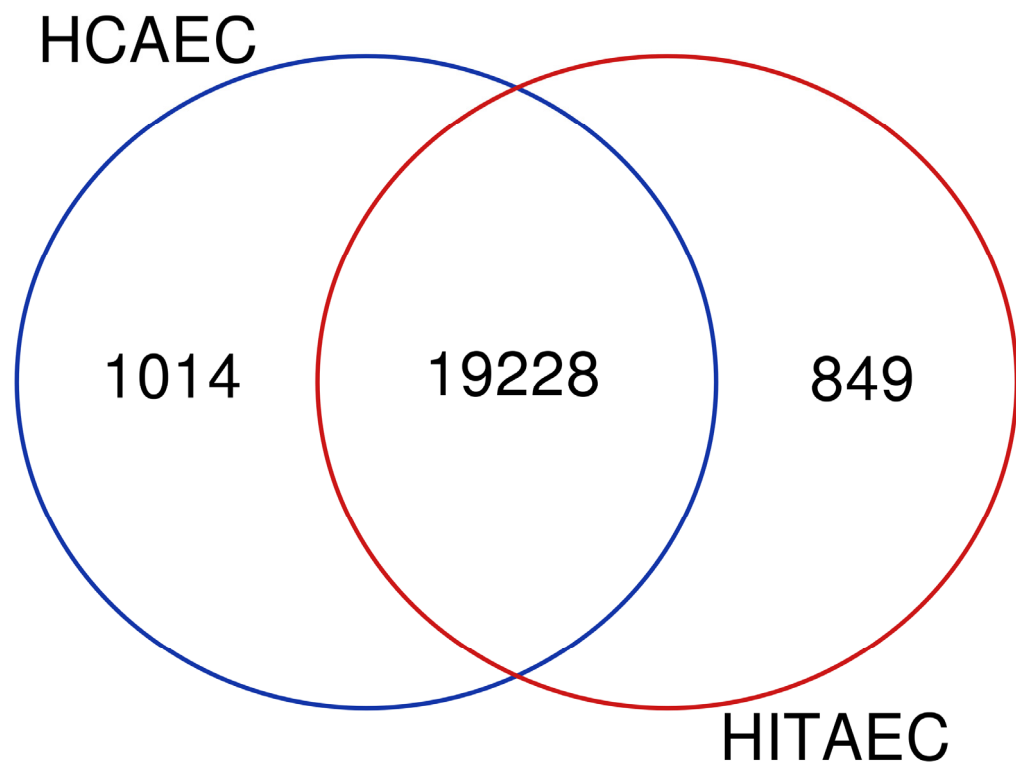

**Supplementary Figure S2.** Venn diagram showing the number of differentially expressed genes (DEGs) in the transcriptome of human coronary artery endothelial cells (HCAEC, 1,014 DEGs) and human internal thoracic artery endothelial cells (HITAEC, 849 DEGs) under laminar flow. DEGs were defined as those with logarithmical fold change  $\geq 1$  and FDR-corrected p value  $\leq 0.05$ .
