# Supplementary material for: Multi-Omics Profiling of Human Endothelial Cells from the Coronary Artery and Internal Thoracic Artery Reveals Molecular but Not Functional Heterogeneity
Source: MDPI journal article supplement (doi:10.3390/ijms241915032), 2023-10-09
Supplement: s1 [file s1]

## SUPPLEMENTARY TABLES

### PROTEOMIC PROFILING

**Supplementary Table S1.** Molecular terms (selected from Gene Ontology (GO), UniProtKB Keywords, Reactome, and Kyoto Encyclopedia of Genes and Genomes (KEGG) databases) common for human coronary artery endothelial cells (HCAEC) and human internal thoracic artery endothelial cells (HITAEC) according to the proteomic profiling and pathway enrichment analysis. Gene Ontology database has been screened by cellular components (CC), molecular function (MF), and biological process (BP) domains.

| Molecular term                                                  | Total proteins | Differentially expressed proteins | Fold enrichment | FDR-corrected <i>p</i> value |
|-----------------------------------------------------------------|----------------|-----------------------------------|-----------------|------------------------------|
| <b>Primary human coronary artery endothelial cells</b>          |                |                                   |                 |                              |
| Focal adhesion (GO CC)                                          | 423            | 18                                | 3.60            | $2.25 \times 10^{-4}$        |
| Cell adhesion molecule binding (GO MF)                          | 552            | 24                                | 3.70            | $4.77 \times 10^{-5}$        |
| Cadherin binding (GO MF)                                        | 325            | 16                                | 4.20            | $1.13 \times 10^{-3}$        |
| Cellular component organization or biogenesis (GO BP)           | 5727           | 100                               | 1.50            | $4.84 \times 10^{-3}$        |
| Mitochondrion (GO CC)                                           | 1671           | 52                                | 2.70            | $1.57 \times 10^{-8}$        |
| Extracellular vesicle (GO CC)                                   | 2123           | 79                                | 3.20            | $4.25 \times 10^{-18}$       |
| <b>Primary human internal thoracic artery endothelial cells</b> |                |                                   |                 |                              |
| Focal adhesion (GO CC)                                          | 423            | 21                                | 3.60            | $4.30 \times 10^{-5}$        |
| Cell adhesion molecule binding (GO MF)                          | 552            | 27                                | 3.60            | $2.08 \times 10^{-5}$        |
| Cadherin binding (GO MF)                                        | 325            | 15                                | 3.40            | $1.55 \times 10^{-2}$        |
| Cellular component organization or biogenesis (GO BP)           | 5727           | 119                               | 1.50            | $3.02 \times 10^{-4}$        |
| Mitochondrion (GO CC)                                           | 1671           | 51                                | 2.20            | $6.10 \times 10^{-6}$        |
| Extracellular vesicle (GO CC)                                   | 2123           | 79                                | 2.70            | $1.21 \times 10^{-13}$       |

**Supplementary Table S2.** Molecular terms (selected from Gene Ontology (GO), UniProtKB Keywords, Reactome, and Kyoto Encyclopedia of Genes and Genomes (KEGG) databases) specific for human coronary artery endothelial cells (HCAEC) according to the proteomic profiling and pathway enrichment analysis. Gene Ontology database has been screened by cellular components (CC), molecular function (MF), and biological process (BP) domains.

| Molecular term                                                        | Total proteins | Differentially expressed proteins | Fold enrichment | FDR-corrected <i>p</i> value |
|-----------------------------------------------------------------------|----------------|-----------------------------------|-----------------|------------------------------|
| Basement membrane organisation (GO BP)                                | 30             | 5                                 | 14.20           | $2.31 \times 10^{-2}$        |
| Collagen-containing extracellular matrix (GO CC)                      | 434            | 15                                | 3.00            | $9.61 \times 10^{-3}$        |
| Metabolism of lipids (Reactome)                                       | 736            | 29                                | 3.40            | $1.32 \times 10^{-5}$        |
| Fatty acid metabolic process (GO BP)                                  | 328            | 15                                | 3.90            | $8.20 \times 10^{-3}$        |
| Organic acid metabolic process (GO BP)                                | 857            | 30                                | 3.00            | $2.86 \times 10^{-4}$        |
| Metabolism of vitamins and cofactors (Reactome)                       | 186            | 11                                | 5.00            | $3.26 \times 10^{-3}$        |
| Carbohydrate metabolic process (GO BP)                                | 475            | 17                                | 3.10            | $2.80 \times 10^{-2}$        |
| COPII-coated endoplasmic reticulum to Golgi transport vesicle (GO CC) | 94             | 6                                 | 5.40            | $3.26 \times 10^{-2}$        |
| Lysosome (GO CC)                                                      | 749            | 27                                | 3.10            | $2.53 \times 10^{-5}$        |
| Peroxisome (GO CC)                                                    | 146            | 8                                 | 4.70            | $1.49 \times 10^{-2}$        |

**Supplementary Table S3.** Molecular terms (selected from Gene Ontology (GO), UniProtKB Keywords, Reactome, and Kyoto Encyclopedia of Genes and Genomes (KEGG) databases) specific for human internal thoracic artery endothelial cells (HITAEC) according to the proteomic profiling and pathway enrichment analysis. Gene Ontology database has been screened by cellular components (CC), molecular function (MF), and biological process (BP) domains.

| Molecular term                                       | Total proteins | Differentially expressed proteins | Fold enrichment | FDR-corrected <i>p</i> value |
|------------------------------------------------------|----------------|-----------------------------------|-----------------|------------------------------|
| Mitochondrial ribosome (GO CC)                       | 90             | 16                                | 13.00           | $1.36 \times 10^{-10}$       |
| Mitochondrial small ribosomal subunit (GO CC)        | 32             | 7                                 | 16.00           | $4.36 \times 10^{-5}$        |
| Mitochondrial large ribosomal subunit (GO CC)        | 56             | 9                                 | 11.70           | $1.39 \times 10^{-5}$        |
| Mitochondrial gene expression (GO BP)                | 141            | 18                                | 9.30            | $3.01 \times 10^{-8}$        |
| Mitochondrial translation (GO BP)                    | 110            | 17                                | 11.20           | $2.27 \times 10^{-8}$        |
| mRNA splicing via spliceosome (GO BP)                | 243            | 14                                | 4.20            | $5.15 \times 10^{-3}$        |
| RNA splicing (GO BP)                                 | 368            | 20                                | 4.00            | $3.02 \times 10^{-4}$        |
| Translation (GO BP)                                  | 379            | 24                                | 4.60            | $3.24 \times 10^{-6}$        |
| Biosynthetic process (GO BP)                         | 2603           | 65                                | 1.80            | $1.32 \times 10^{-3}$        |
| Cellular nitrogen compound metabolic process (GO BP) | 3573           | 98                                | 2.00            | $3.25 \times 10^{-8}$        |

|                                                      |      |    |      |                       |
|------------------------------------------------------|------|----|------|-----------------------|
| Organonitrogen compound biosynthetic process (GO BP) | 1333 | 40 | 2.20 | $2.45 \times 10^{-3}$ |
| mRNA processing (GO BP)                              | 451  | 21 | 3.40 | $1.26 \times 10^{-3}$ |
| Macromolecule biosynthetic process (GO BP)           | 1487 | 42 | 2.10 | $5.91 \times 10^{-3}$ |
| Elastic fibre formation (Reactome)                   | 45   | 6  | 9.70 | $7.77 \times 10^{-3}$ |

**Supplementary Table S4.** Differentially expressed proteins across the cellular compartments in human coronary artery endothelial cells (HCAEC) and human internal thoracic artery endothelial cells (HITAEC), according to the Gene Ontology Cellular Component database.

| Gene Ontology term                                              | Total proteins | Differentially expressed proteins | Fold enrichment | FDR-corrected <i>p</i> value |
|-----------------------------------------------------------------|----------------|-----------------------------------|-----------------|------------------------------|
| <b>Primary human coronary artery endothelial cells</b>          |                |                                   |                 |                              |
| COPII-coated ER to Golgi transport vesicle                      | 94             | 6                                 | 5.40            | $3.26 \times 10^{-2}$        |
| Nucleosome                                                      | 99             | 6                                 | 5.20            | $3.91 \times 10^{-2}$        |
| Peroxisome                                                      | 146            | 8                                 | 4.70            | $1.49 \times 10^{-2}$        |
| Focal adhesion                                                  | 423            | 18                                | 3.60            | $2.25 \times 10^{-4}$        |
| Extracellular vesicle                                           | 2123           | 79                                | 3.20            | $4.25 \times 10^{-18}$       |
| Lysosome                                                        | 749            | 27                                | 3.10            | $2.53 \times 10^{-5}$        |
| Coated vesicle                                                  | 310            | 11                                | 3.00            | $3.83 \times 10^{-2}$        |
| Collagen-containing extracellular matrix                        | 434            | 15                                | 3.00            | $9.61 \times 10^{-3}$        |
| Mitochondrion                                                   | 1671           | 52                                | 2.70            | $1.57 \times 10^{-8}$        |
| Endoplasmic reticulum                                           | 2045           | 49                                | 2.00            | $8.95 \times 10^{-5}$        |
| <b>Primary human internal thoracic artery endothelial cells</b> |                |                                   |                 |                              |
| RNA polymerase I complex                                        | 13             | 3                                 | 16.80           | $2.79 \times 10^{-2}$        |
| Mitochondrial small ribosomal subunit                           | 32             | 7                                 | 16.00           | $4.36 \times 10^{-5}$        |
| Mitochondrial ribosome                                          | 90             | 16                                | 13.00           | $1.36 \times 10^{-10}$       |
| Mitochondrial large ribosomal subunit                           | 56             | 9                                 | 11.70           | $1.39 \times 10^{-5}$        |
| Ribosomal subunit                                               | 189            | 18                                | 6.90            | $4.60 \times 10^{-8}$        |
| Ribosome                                                        | 118            | 18                                | 5.80            | $6.35 \times 10^{-7}$        |
| Focal adhesion                                                  | 423            | 21                                | 3.60            | $4.30 \times 10^{-5}$        |
| Extracellular vesicle                                           | 2123           | 79                                | 2.70            | $1.21 \times 10^{-13}$       |
| Cell-cell junction                                              | 508            | 17                                | 2.40            | $2.19 \times 10^{-2}$        |

|               |      |    |      |                       |
|---------------|------|----|------|-----------------------|
| Mitochondrion | 1671 | 51 | 2.20 | $6.10 \times 10^{-6}$ |
|---------------|------|----|------|-----------------------|

**Supplementary Table S5.** Differentially expressed proteins across the cellular compartments in human coronary artery endothelial cells (HCAEC) and human internal thoracic artery endothelial cells (HITAEC), according to the UniProtKB Keywords database.

| Pathway                                                         | Total proteins | Percent from differentially expressed proteins | Fold enrichment | FDR-corrected <i>p</i> value |
|-----------------------------------------------------------------|----------------|------------------------------------------------|-----------------|------------------------------|
| <b>Primary human coronary artery endothelial cells</b>          |                |                                                |                 |                              |
| Nucleosome core                                                 | 16             | 6.2                                            | 12.90           | $5.50 \times 10^{-11}$       |
| Mitochondrion outer membrane                                    | 8              | 3.1                                            | 4.00            | $3.10 \times 10^{-2}$        |
| Chromosome                                                      | 25             | 9.8                                            | 3.20            | $2.60 \times 10^{-5}$        |
| Lysosome                                                        | 13             | 5.1                                            | 2.50            | $3.40 \times 10^{-2}$        |
| Mitochondrion                                                   | 39             | 15.2                                           | 2.20            | $7.90 \times 10^{-5}$        |
| Endoplasmic reticulum                                           | 38             | 14.8                                           | 2.10            | $1.40 \times 10^{-4}$        |
| <b>Primary human internal thoracic artery endothelial cells</b> |                |                                                |                 |                              |
| Spliceosome                                                     | 10             | 3.5                                            | 4.70            | $5.60 \times 10^{-3}$        |
| Mitochondrion                                                   | 42             | 14.5                                           | 2.20            | $1.30 \times 10^{-4}$        |

**Supplementary Table S6.** Molecular functions of proteins which are differentially expressed human coronary artery endothelial cells (HCAEC) and human internal thoracic artery endothelial cells (HITAEC), according to the Gene Ontology Molecular Function database.

| Gene Ontology term                                     | Total proteins | Differentially expressed proteins | Fold enrichment | FDR-corrected <i>p</i> value |
|--------------------------------------------------------|----------------|-----------------------------------|-----------------|------------------------------|
| <b>Primary human coronary artery endothelial cells</b> |                |                                   |                 |                              |
| Cuprous ion binding                                    | 8              | 3                                 | 32.00           | $4.88 \times 10^{-2}$        |
| Structural constituent of chromatin                    | 66             | 6                                 | 7.80            | $4.03 \times 10^{-2}$        |
| Cadherin binding                                       | 325            | 16                                | 4.20            | $1.13 \times 10^{-3}$        |
| Oxidoreductase activity                                | 741            | 33                                | 3.80            | $2.55 \times 10^{-7}$        |
| Cell adhesion molecule binding                         | 552            | 24                                | 3.70            | $4.77 \times 10^{-5}$        |

| Primary human internal thoracic artery endothelial cells |     |    |       |                       |
|----------------------------------------------------------|-----|----|-------|-----------------------|
| Insulin-like growth factor binding                       | 20  | 5  | 18.20 | $6.14 \times 10^{-3}$ |
| Ephrin receptor binding                                  | 30  | 5  | 12.20 | $2.29 \times 10^{-2}$ |
| Extracellular matrix binding                             | 56  | 7  | 9.10  | $6.47 \times 10^{-3}$ |
| Cell adhesion molecule binding                           | 552 | 27 | 3.60  | $2.08 \times 10^{-5}$ |
| Cadherin binding                                         | 325 | 15 | 3.40  | $1.55 \times 10^{-2}$ |

**Supplementary Table S7.** Molecular functions of proteins which are differentially expressed human coronary artery endothelial cells (HCAEC) and human internal thoracic artery endothelial cells (HITAEC), according to the UniProtKB Keywords database.

| Pathway                                                  | Total proteins | Percent from differentially expressed proteins | Fold enrichment | FDR-corrected <i>p</i> value |
|----------------------------------------------------------|----------------|------------------------------------------------|-----------------|------------------------------|
| Primary human coronary artery endothelial cells          |                |                                                |                 |                              |
| Isomerase                                                | 12             | 4.7                                            | 5.20            | $5.90 \times 10^{-4}$        |
| Oxidoreductase                                           | 25             | 9.8                                            | 2.70            | $5.90 \times 10^{-4}$        |
| Primary human internal thoracic artery endothelial cells |                |                                                |                 |                              |
| Growth factor binding                                    | 4              | 1.4                                            | 14.30           | $3.90 \times 10^{-2}$        |
| Ribosomal protein                                        | 16             | 5.5                                            | 5.90            | $4.40 \times 10^{-6}$        |
| Ribonucleoprotein                                        | 17             | 5.9                                            | 4.00            | $1.60 \times 10^{-4}$        |
| Chaperone                                                | 12             | 4.2                                            | 3.80            | $5.90 \times 10^{-3}$        |

**Supplementary Table S8.** Biological processes which involve proteins that are differentially expressed in human coronary artery endothelial cells (HCAEC) and human internal thoracic artery endothelial cells (HITAEC), according to the Gene Ontology Biological Process database.

| Gene Ontology term                              | Total proteins | Differentially expressed proteins | Fold enrichment | FDR-corrected <i>p</i> value |
|-------------------------------------------------|----------------|-----------------------------------|-----------------|------------------------------|
| Primary human coronary artery endothelial cells |                |                                   |                 |                              |
| Basement membrane organization                  | 30             | 5                                 | 14.20           | $2.31 \times 10^{-2}$        |

|                                                                 |      |     |       |                       |
|-----------------------------------------------------------------|------|-----|-------|-----------------------|
| Fatty acid catabolic process                                    | 85   | 8   | 8.00  | $8.16 \times 10^{-3}$ |
| Electron transport chain                                        | 167  | 10  | 5.10  | $2.08 \times 10^{-2}$ |
| Fatty acid metabolic process                                    | 328  | 15  | 3.90  | $8.20 \times 10^{-3}$ |
| Generation of precursor metabolites and energy                  | 406  | 18  | 3.80  | $2.23 \times 10^{-3}$ |
| Mitochondrion organization                                      | 445  | 16  | 3.10  | $4.04 \times 10^{-2}$ |
| Carbohydrate metabolic process                                  | 475  | 17  | 3.10  | $2.80 \times 10^{-2}$ |
| Organic acid metabolic process                                  | 857  | 30  | 3.00  | $2.86 \times 10^{-4}$ |
| Membrane organization                                           | 851  | 28  | 2.80  | $1.55 \times 10^{-3}$ |
| Endomembrane system organization                                | 554  | 18  | 2.80  | $4.47 \times 10^{-2}$ |
| Lipid biosynthetic process                                      | 604  | 19  | 2.70  | $4.46 \times 10^{-2}$ |
| Lipid metabolic process                                         | 1234 | 37  | 2.60  | $3.18 \times 10^{-4}$ |
| Organophosphate metabolic process                               | 931  | 25  | 2.30  | $4.73 \times 10^{-2}$ |
| Cellular component biogenesis                                   | 2633 | 53  | 1.70  | $3.80 \times 10^{-2}$ |
| Cellular component organization or biogenesis                   | 5727 | 100 | 1.50  | $4.84 \times 10^{-3}$ |
| <b>Primary human internal thoracic artery endothelial cells</b> |      |     |       |                       |
| Mitochondrial translation                                       | 110  | 17  | 11.20 | $2.27 \times 10^{-8}$ |
| Mitochondrial gene expression                                   | 141  | 18  | 9.30  | $3.01 \times 10^{-8}$ |
| Regulation of cell shape                                        | 155  | 11  | 5.20  | $6.71 \times 10^{-3}$ |
| Translation                                                     | 379  | 24  | 4.60  | $3.24 \times 10^{-6}$ |
| mRNA splicing, via spliceosome                                  | 243  | 14  | 4.20  | $5.15 \times 10^{-3}$ |
| RNA splicing                                                    | 368  | 20  | 4.00  | $3.02 \times 10^{-4}$ |
| mRNA processing                                                 | 451  | 21  | 3.40  | $1.26 \times 10^{-3}$ |
| Positive regulation of cell motility                            | 558  | 22  | 2.90  | $6.00 \times 10^{-3}$ |
| Cellular nitrogen compound biosynthetic process                 | 1588 | 54  | 2.50  | $2.25 \times 10^{-6}$ |
| RNA processing                                                  | 868  | 29  | 2.40  | $6.79 \times 10^{-3}$ |
| Organonitrogen compound biosynthetic process                    | 1333 | 40  | 2.20  | $2.45 \times 10^{-3}$ |
| Macromolecule biosynthetic process                              | 1487 | 42  | 2.10  | $5.91 \times 10^{-3}$ |
| Cellular nitrogen compound metabolic process                    | 3573 | 98  | 2.00  | $3.25 \times 10^{-8}$ |
| Biosynthetic process                                            | 2603 | 65  | 1.80  | $1.32 \times 10^{-3}$ |
| Cellular component organization or biogenesis                   | 5727 | 119 | 1.50  | $3.02 \times 10^{-4}$ |

**Supplementary Table S9.** Biological processes which involve proteins that are differentially expressed in human coronary artery endothelial cells (HCAEC) and human internal thoracic artery endothelial cells (HITAEC), according to the Reactome database.

| Reactome pathway                                                | Total proteins | Differentially expressed proteins | Fold enrichment | FDR-corrected <i>p</i> value |
|-----------------------------------------------------------------|----------------|-----------------------------------|-----------------|------------------------------|
| <b>Primary human coronary artery endothelial cells</b>          |                |                                   |                 |                              |
| Cholesterol biosynthesis                                        | 24             | 4                                 | 14.20           | $3.26 \times 10^{-2}$        |
| RHOJ GTPase cycle                                               | 54             | 8                                 | 12.70           | $2.34 \times 10^{-4}$        |
| Transcriptional regulation by small RNAs                        | 73             | 6                                 | 7.00            | $3.36 \times 10^{-2}$        |
| Metabolism of water-soluble vitamins and cofactors              | 120            | 8                                 | 5.70            | $1.63 \times 10^{-2}$        |
| Fatty acid metabolism                                           | 174            | 11                                | 5.40            | $1.94 \times 10^{-3}$        |
| Metabolism of vitamins and cofactors                            | 186            | 11                                | 5.00            | $3.26 \times 10^{-3}$        |
| RHO GTPase Effectors                                            | 288            | 12                                | 3.60            | $2.46 \times 10^{-2}$        |
| Metabolism of lipids                                            | 736            | 29                                | 3.40            | $1.32 \times 10^{-5}$        |
| Signaling by Rho GTPases                                        | 670            | 24                                | 3.10            | $3.98 \times 10^{-4}$        |
| RHO GTPase cycle                                                | 448            | 16                                | 3.00            | $1.50 \times 10^{-2}$        |
| <b>Primary human internal thoracic artery endothelial cells</b> |                |                                   |                 |                              |
| PECAM1 interactions                                             | 11             | 3                                 | 19.90           | $3.74 \times 10^{-2}$        |
| Mitochondrial translation                                       | 94             | 16                                | 12.40           | $1.12 \times 10^{-9}$        |
| Elastic fibre formation                                         | 45             | 6                                 | 9.70            | $7.77 \times 10^{-3}$        |
| trans-Golgi Network Vesicle Budding                             | 72             | 9                                 | 9.10            | $3.06 \times 10^{-4}$        |
| Integrin cell surface interactions                              | 84             | 9                                 | 7.80            | $7.84 \times 10^{-4}$        |
| Post-translational protein phosphorylation                      | 107            | 11                                | 7.50            | $1.50 \times 10^{-4}$        |
| ECM proteoglycans                                               | 76             | 7                                 | 6.70            | $1.43 \times 10^{-2}$        |
| mRNA Splicing                                                   | 188            | 14                                | 5.40            | $1.57 \times 10^{-4}$        |
| Nucleotide Excision Repair                                      | 110            | 8                                 | 5.30            | $1.75 \times 10^{-2}$        |
| Cell surface interactions at the vascular wall                  | 197            | 10                                | 3.70            | $3.51 \times 10^{-2}$        |

**Supplementary Table S10.** Biological processes which involve proteins that are differentially expressed in human coronary artery endothelial cells (HCAEC) and human internal thoracic artery endothelial cells (HITAEC), according to the Kyoto Encyclopedia of Genes and Genomes (KEGG) database.

| Pathway                                                         | Total proteins | Percent from differentially expressed proteins | Fold enrichment | FDR-corrected <i>p</i> value |
|-----------------------------------------------------------------|----------------|------------------------------------------------|-----------------|------------------------------|
| <b>Primary human coronary artery endothelial cells</b>          |                |                                                |                 |                              |
| Lipid metabolism                                                | 23             | 9.0                                            | 2.60            | $4.70 \times 10^{-3}$        |
| <b>Primary human internal thoracic artery endothelial cells</b> |                |                                                |                 |                              |
| mRNA splicing                                                   | 17             | 5.9                                            | 3.60            | $1.30 \times 10^{-3}$        |
| mRNA processing                                                 | 19             | 6.6                                            | 3.10            | $1.30 \times 10^{-3}$        |
| Cell adhesion                                                   | 18             | 6.2                                            | 2.30            | $4.00 \times 10^{-2}$        |

**Supplementary Table S11.** Biochemical pathways which involve proteins that are differentially expressed in human coronary artery endothelial cells (HCAEC) and human internal thoracic artery endothelial cells (HITAEC), according to the Kyoto Encyclopedia of Genes and Genomes (KEGG) database.

| Pathway                                                         | Total proteins | Percent from differentially expressed proteins | Fold enrichment | FDR-corrected <i>p</i> value |
|-----------------------------------------------------------------|----------------|------------------------------------------------|-----------------|------------------------------|
| <b>Primary human coronary artery endothelial cells</b>          |                |                                                |                 |                              |
| Neutrophil extracellular trap formation                         | 19             | 7.4                                            | 5.10            | $6.60 \times 10^{-6}$        |
| Metabolic pathways                                              | 51             | 19.9                                           | 1.70            | $4.10 \times 10^{-3}$        |
| <b>Primary human internal thoracic artery endothelial cells</b> |                |                                                |                 |                              |
| Spliceosome                                                     | 11             | 3.8                                            | 4.00            | $5.10 \times 10^{-2}$        |



## TRANSCRIPTOMIC PROFILING UNDER LAMINAR FLOW

**Supplementary Table S12.** Molecular terms (selected from Gene Ontology (GO), UniProtKB Keywords, Reactome, and Kyoto Encyclopedia of Genes and Genomes (KEGG) databases) common for human coronary artery endothelial cells (HCAEC) and human internal thoracic artery endothelial cells (HITAEC) cultured under laminar flow according to the RNA sequencing and pathway enrichment analysis. Gene Ontology database has been screened by cellular components (CC), molecular function (MF), and biological process (BP) domains.

| Molecular term                                                  | Total genes | Differentially expressed genes | Fold enrichment | FDR-corrected <i>p</i> value |
|-----------------------------------------------------------------|-------------|--------------------------------|-----------------|------------------------------|
| <b>Primary human coronary artery endothelial cells</b>          |             |                                |                 |                              |
| Collagen-containing extracellular matrix (GO CC)                | 434         | 43                             | 2.40            | $2.99 \times 10^{-5}$        |
| Extracellular matrix (GO CC)                                    | 575         | 54                             | 2.30            | $7.38 \times 10^{-6}$        |
| Cell-matrix adhesion (GO BP)                                    | 135         | 15                             | 2.70            | $4.38 \times 10^{-2}$        |
| Glycosaminoglycan binding (GO MF)                               | 242         | 28                             | 2.80            | $1.07 \times 10^{-3}$        |
| Calcium signaling pathway (KEGG)                                | 25          | 3                              | 2.40            | $3.5 \times 10^{-3}$         |
| Cell junction (UniProtKB Keywords)                              | 82          | 9                              | 2.30            | $1.7 \times 10^{-10}$        |
| Secreted (UniProtKB Keywords)                                   | 123         | 13                             | 1.40            | $4.9 \times 10^{-4}$         |
| DNA repair (GO BP)                                              | 508         | 7                              | 0.30            | $3.98 \times 10^{-2}$        |
| RNA processing (GO BP)                                          | 868         | 9                              | 0.25            | $4.30 \times 10^{-5}$        |
| Protein ubiquitination (GO BP)                                  | 684         | 11                             | 0.40            | $2.66 \times 10^{-2}$        |
| Macroautophagy (GO BP)                                          | 189         | 0                              | 0.01            | $4.64 \times 10^{-2}$        |
| <b>Primary human internal thoracic artery endothelial cells</b> |             |                                |                 |                              |
| Collagen-containing extracellular matrix (GO CC)                | 434         | 43                             | 2.80            | $1.35 \times 10^{-6}$        |
| Extracellular matrix (GO CC)                                    | 575         | 63                             | 3.10            | $1.72 \times 10^{-11}$       |
| Cell-substrate adhesion (GO BP)                                 | 194         | 19                             | 2.80            | $1.01 \times 10^{-2}$        |
| Glycosaminoglycan binding (GO MF)                               | 242         | 25                             | 2.90            | $3.77 \times 10^{-3}$        |
| Calcium signaling pathway (KEGG)                                | 22          | 3                              | 2.40            | $2.3 \times 10^{-2}$         |
| Cell junction (UniProtKB Keywords)                              | 53          | 7                              | 1.70            | $2.7 \times 10^{-3}$         |
| Secreted (UniProtKB Keywords)                                   | 137         | 17                             | 1.80            | $4.0 \times 10^{-10}$        |
| DNA repair (GO BP)                                              | 508         | 3                              | 0.17            | $3.83 \times 10^{-3}$        |
| RNA processing (GO BP)                                          | 868         | 3                              | 0.10            | $2.92 \times 10^{-7}$        |
| Ubiquitin-dependent protein catabolic process (GO BP)           | 575         | 6                              | 0.30            | $2.55 \times 10^{-2}$        |

|                   |     |   |      |                       |
|-------------------|-----|---|------|-----------------------|
| Autophagy (GO BP) | 303 | 1 | 0.10 | $3.39 \times 10^{-2}$ |
|-------------------|-----|---|------|-----------------------|

**Supplementary Table S13.** Molecular terms (selected from Gene Ontology (GO), UniProtKB Keywords, Reactome, and Kyoto Encyclopedia of Genes and Genomes (KEGG) databases) specific for human coronary artery endothelial cells (HCAEC) cultured under laminar flow according to the RNA sequencing and pathway enrichment analysis. Gene Ontology database has been screened by cellular components (CC), molecular function (MF), and biological process (BP) domains.

| Molecular term                                         | Total genes | Differentially expressed genes | Fold enrichment | FDR-corrected <i>p</i> value |
|--------------------------------------------------------|-------------|--------------------------------|-----------------|------------------------------|
| Collagen trimer (GO CC)                                | 88          | 13                             | 3.60            | $4.77 \times 10^{-3}$        |
| Collagen-containing extracellular matrix (GO CC)       | 434         | 43                             | 2.40            | $2.99 \times 10^{-5}$        |
| Collagen biosynthesis and modifying enzymes (Reactome) | 67          | 12                             | 4.30            | $1.41 \times 10^{-2}$        |
| Collagen formation (Reactome)                          | 89          | 13                             | 3.50            | $3.49 \times 10^{-2}$        |
| Collagen binding (GO MF)                               | 70          | 15                             | 5.20            | $6.19 \times 10^{-4}$        |
| Basal plasma membrane (GO CC)                          | 256         | 28                             | 2.60            | $3.84 \times 10^{-4}$        |
| Cell-cell junction (GO CC)                             | 508         | 43                             | 2.00            | $9.83 \times 10^{-4}$        |
| Proteoglycan binding (GO MF)                           | 37          | 10                             | 6.50            | $2.29 \times 10^{-3}$        |
| Integrin binding (GO MF)                               | 159         | 23                             | 3.50            | $7.84 \times 10^{-4}$        |
| Elastic fiber assembly (GO BP)                         | 12          | 5                              | 10.10           | $2.30 \times 10^{-2}$        |

**Supplementary Table S14.** Molecular terms (selected from Gene Ontology (GO), UniProtKB Keywords, Reactome, and Kyoto Encyclopedia of Genes and Genomes (KEGG) databases) specific for human internal thoracic artery endothelial cells (HITAEC) cultured under laminar flow according to the RNA sequencing and pathway enrichment analysis. Gene Ontology database has been screened by cellular components (CC), molecular function (MF), and biological process (BP) domains.

| Molecular term                          | Total genes | Differentially expressed genes | Fold enrichment | FDR-corrected <i>p</i> value |
|-----------------------------------------|-------------|--------------------------------|-----------------|------------------------------|
| Cortical cytoskeleton (GO CC)           | 111         | 13                             | 3.30            | $1.30 \times 10^{-2}$        |
| Actin cytoskeleton (GO CC)              | 510         | 34                             | 1.90            | $2.49 \times 10^{-2}$        |
| Actin cytoskeleton organization (GO BP) | 549         | 40                             | 2.10            | $4.26 \times 10^{-3}$        |

|                                                         |      |     |       |                       |
|---------------------------------------------------------|------|-----|-------|-----------------------|
| Glycosaminoglycan biosynthetic process (GO BP)          | 70   | 10  | 4.00  | $2.26 \times 10^{-2}$ |
| Glycosaminoglycan metabolism (Reactome)                 | 123  | 16  | 3.70  | $1.07 \times 10^{-2}$ |
| Extracellular vesicle (GO CC)                           | 2123 | 107 | 1.40  | $1.08 \times 10^{-2}$ |
| Positive regulation of chemokine production (GO BP)     | 71   | 10  | 4.00  | $2.50 \times 10^{-2}$ |
| Positive regulation of CXCL2 production (GO BP)         | 10   | 4   | 11.30 | $4.92 \times 10^{-2}$ |
| Positive regulation of interleukin-6 production (GO BP) | 98   | 13  | 3.80  | $8.50 \times 10^{-3}$ |
| Positive regulation of cytokine production (GO BP)      | 481  | 37  | 2.20  | $2.74 \times 10^{-3}$ |

**Supplementary Table S15.** Differentially expressed genes across the cellular compartments in human coronary artery endothelial cells (HCAEC) and human internal thoracic artery endothelial cells (HITAEC) cultured under laminar flow, according to the Gene Ontology Cellular Component database.

| Gene Ontology term                                              | Total genes | Differentially expressed genes | Fold enrichment | FDR-corrected <i>p</i> value |
|-----------------------------------------------------------------|-------------|--------------------------------|-----------------|------------------------------|
| <b>Primary human coronary artery endothelial cells</b>          |             |                                |                 |                              |
| Collagen trimer                                                 | 88          | 13                             | 3.60            | $4.77 \times 10^{-3}$        |
| Basement membrane                                               | 101         | 14                             | 3.40            | $4.84 \times 10^{-3}$        |
| Basal plasma membrane                                           | 256         | 28                             | 2.60            | $3.84 \times 10^{-4}$        |
| Collagen-containing extracellular matrix                        | 434         | 43                             | 2.40            | $2.99 \times 10^{-5}$        |
| Extracellular matrix                                            | 575         | 54                             | 2.30            | $7.38 \times 10^{-6}$        |
| Cell-cell junction                                              | 508         | 43                             | 2.00            | $9.83 \times 10^{-4}$        |
| Microtubule cytoskeleton                                        | 1374        | 35                             | 0.60            | $4.74 \times 10^{-2}$        |
| Mitochondrion                                                   | 1671        | 36                             | 0.50            | $5.04 \times 10^{-4}$        |
| Mitochondrial inner membrane                                    | 497         | 6                              | 0.30            | $1.08 \times 10^{-2}$        |
| Ribonucleoprotein complex                                       | 714         | 9                              | 0.30            | $7.98 \times 10^{-4}$        |
| <b>Primary human internal thoracic artery endothelial cells</b> |             |                                |                 |                              |
| Cortical cytoskeleton                                           | 111         | 13                             | 3.30            | $1.30 \times 10^{-2}$        |
| Golgi lumen                                                     | 104         | 12                             | 3.30            | $2.24 \times 10^{-2}$        |
| Lysosomal lumen                                                 | 98          | 11                             | 3.20            | $4.00 \times 10^{-2}$        |
| Sarcomere                                                       | 215         | 18                             | 2.40            | $4.45 \times 10^{-2}$        |

|                                          |      |     |      |                        |
|------------------------------------------|------|-----|------|------------------------|
| Collagen-containing extracellular matrix | 434  | 43  | 2.80 | $1.35 \times 10^{-6}$  |
| Extracellular matrix                     | 575  | 63  | 3.10 | $1.72 \times 10^{-11}$ |
| Transport vesicle                        | 429  | 29  | 1.90 | $4.77 \times 10^{-2}$  |
| Actin cytoskeleton                       | 510  | 34  | 1.90 | $2.49 \times 10^{-2}$  |
| Extracellular vesicle                    | 2123 | 107 | 1.40 | $1.08 \times 10^{-2}$  |
| Ribonucleoprotein complex                | 714  | 2   | 0.08 | $1.36 \times 10^{-6}$  |

**Supplementary Table S16.** Differentially expressed genes across the cellular compartments in human coronary artery endothelial cells (HCAEC) and human internal thoracic artery endothelial cells (HITAEC) cultured under laminar flow, according to the UniProtKB Keywords database.

| Pathway                                                         | Total genes | Percent from differentially expressed genes | Fold enrichment | FDR-corrected <i>p</i> value |
|-----------------------------------------------------------------|-------------|---------------------------------------------|-----------------|------------------------------|
| <b>Primary human coronary artery endothelial cells</b>          |             |                                             |                 |                              |
| Extracellular matrix                                            | 28          | 2.9                                         | 2.50            | $1.90 \times 10^{-4}$        |
| Cell junction                                                   | 82          | 8.5                                         | 2.30            | $1.70 \times 10^{-10}$       |
| Cell membrane                                                   | 233         | 24.2                                        | 1.50            | $1.30 \times 10^{-9}$        |
| Secreted                                                        | 123         | 12.8                                        | 1.40            | $4.90 \times 10^{-4}$        |
| Membrane                                                        | 411         | 42.7                                        | 1.20            | $3.10 \times 10^{-7}$        |
| <b>Primary human internal thoracic artery endothelial cells</b> |             |                                             |                 |                              |
| Extracellular matrix                                            | 32          | 4.0                                         | 3.20            | $4.20 \times 10^{-7}$        |
| Secreted                                                        | 137         | 17.1                                        | 1.80            | $4.00 \times 10^{-10}$       |
| Cell junction                                                   | 53          | 6.6                                         | 1.70            | $2.70 \times 10^{-3}$        |
| Cell projection                                                 | 65          | 8.1                                         | 1.60            | $3.00 \times 10^{-3}$        |
| Cell membrane                                                   | 191         | 23.8                                        | 1.40            | $1.10 \times 10^{-5}$        |

**Supplementary Table S17.** Molecular functions of genes which are differentially expressed human coronary artery endothelial cells (HCAEC) and human internal thoracic artery endothelial cells (HITAEC) cultured under laminar flow, according to the Gene Ontology Molecular Function database.

| Gene Ontology term                                              | Total genes | Differentially expressed genes | Fold enrichment | FDR-corrected <i>p</i> value |
|-----------------------------------------------------------------|-------------|--------------------------------|-----------------|------------------------------|
| <b>Primary human coronary artery endothelial cells</b>          |             |                                |                 |                              |
| Proteoglycan binding                                            | 37          | 10                             | 6.50            | $2.29 \times 10^{-3}$        |
| Collagen binding                                                | 70          | 15                             | 5.20            | $6.19 \times 10^{-4}$        |
| Integrin binding                                                | 159         | 23                             | 3.50            | $7.84 \times 10^{-4}$        |
| Glycosaminoglycan binding                                       | 242         | 28                             | 2.80            | $1.07 \times 10^{-3}$        |
| Cell adhesion molecule binding                                  | 552         | 56                             | 2.50            | $2.43 \times 10^{-5}$        |
| <b>Primary human internal thoracic artery endothelial cells</b> |             |                                |                 |                              |
| Chemorepellent activity                                         | 29          | 9                              | 8.80            | $3.27 \times 10^{-3}$        |
| Receptor ligand activity                                        | 497         | 39                             | 2.20            | $5.15 \times 10^{-3}$        |
| Glycosaminoglycan binding                                       | 242         | 25                             | 2.90            | $3.77 \times 10^{-3}$        |
| Calcium ion binding                                             | 753         | 57                             | 2.20            | $1.91 \times 10^{-4}$        |
| RNA binding                                                     | 1666        | 17                             | 0.30            | $8.06 \times 10^{-7}$        |

**Supplementary Table S18.** Molecular functions of genes which are differentially expressed human coronary artery endothelial cells (HCAEC) and human internal thoracic artery endothelial cells (HITAEC) cultured under laminar flow, according to the UniProtKB Keywords database.

| Pathway                                                         | Total genes | Percent from differentially expressed genes | Fold enrichment | FDR-corrected <i>p</i> value |
|-----------------------------------------------------------------|-------------|---------------------------------------------|-----------------|------------------------------|
| <b>Primary human coronary artery endothelial cells</b>          |             |                                             |                 |                              |
| Sodium channel                                                  | 9           | 0.9                                         | 7.50            | $2.30 \times 10^{-4}$        |
| Heparin-binding                                                 | 14          | 1.5                                         | 3.60            | $1.30 \times 10^{-3}$        |
| Calcium channel                                                 | 10          | 1.0                                         | 3.60            | $1.70 \times 10^{-2}$        |
| Voltage-gated channel                                           | 22          | 2.3                                         | 3.50            | $1.60 \times 10^{-5}$        |
| Ion channel                                                     | 39          | 4.0                                         | 2.60            | $2.90 \times 10^{-6}$        |
| <b>Primary human internal thoracic artery endothelial cells</b> |             |                                             |                 |                              |
| Integrin                                                        | 8           | 1.0                                         | 4.70            | $2.60 \times 10^{-2}$        |

|               |    |     |      |                       |
|---------------|----|-----|------|-----------------------|
| Growth factor | 14 | 1.7 | 2.90 | $2.60 \times 10^{-2}$ |
| Actin-binding | 22 | 2.7 | 2.10 | $3.10 \times 10^{-2}$ |

**Supplementary Table S19.** Biological processes which involve genes that are differentially expressed in human coronary artery endothelial cells (HCAEC) and human internal thoracic artery endothelial cells (HITAEC) cultured under laminar flow, according to the Gene Ontology Biological Process database.

| Gene Ontology term                                                          | Total genes | Differentially expressed genes | Fold enrichment | FDR-corrected <i>p</i> value |
|-----------------------------------------------------------------------------|-------------|--------------------------------|-----------------|------------------------------|
| <b>Primary human coronary artery endothelial cells</b>                      |             |                                |                 |                              |
| Elastic fiber assembly                                                      | 12          | 5                              | 10.10           | $2.30 \times 10^{-2}$        |
| Heterophilic cell-cell adhesion via plasma membrane cell adhesion molecules | 52          | 13                             | 6.10            | $2.17 \times 10^{-4}$        |
| Artery morphogenesis                                                        | 67          | 10                             | 3.60            | $4.29 \times 10^{-2}$        |
| Homophilic cell adhesion via plasma membrane adhesion molecules             | 170         | 22                             | 3.10            | $1.06 \times 10^{-3}$        |
| Cell-cell adhesion                                                          | 543         | 69                             | 3.10            | $6.16 \times 10^{-12}$       |
| Cell adhesion                                                               | 969         | 107                            | 2.70            | $3.64 \times 10^{-15}$       |
| Cell-matrix adhesion                                                        | 135         | 15                             | 2.70            | $4.38 \times 10^{-2}$        |
| Extracellular matrix organization                                           | 280         | 28                             | 2.40            | $4.19 \times 10^{-3}$        |
| Nucleic acid metabolic process                                              | 2276        | 46                             | 0.50            | $6.22 \times 10^{-6}$        |
| DNA metabolic process                                                       | 794         | 15                             | 0.50            | $4.16 \times 10^{-2}$        |
| Protein ubiquitination                                                      | 684         | 11                             | 0.40            | $2.66 \times 10^{-2}$        |
| DNA repair                                                                  | 508         | 7                              | 0.30            | $3.98 \times 10^{-2}$        |
| RNA processing                                                              | 868         | 9                              | 0.25            | $4.30 \times 10^{-5}$        |
| Ribonucleoprotein complex biogenesis                                        | 449         | 3                              | 0.16            | $2.56 \times 10^{-3}$        |
| Macroautophagy                                                              | 189         | 0                              | 0.01            | $4.64 \times 10^{-2}$        |
| <b>Primary human internal thoracic artery endothelial cells</b>             |             |                                |                 |                              |
| Positive regulation of chemokine (C-X-C motif) ligand 2 production          | 10          | 4                              | 11.30           | $4.92 \times 10^{-2}$        |
| cGMP-mediated signaling                                                     | 28          | 7                              | 7.10            | $1.10 \times 10^{-2}$        |
| Collagen fibril organization                                                | 60          | 9                              | 4.30            | $3.06 \times 10^{-2}$        |
| Glycosaminoglycan biosynthetic process                                      | 70          | 10                             | 4.00            | $2.26 \times 10^{-2}$        |

|                                                 |     |    |      |                       |
|-------------------------------------------------|-----|----|------|-----------------------|
| Response to cAMP                                | 93  | 13 | 4.00 | $5.91 \times 10^{-3}$ |
| Positive regulation of chemokine production     | 71  | 10 | 4.00 | $2.50 \times 10^{-2}$ |
| Positive regulation of interleukin-6 production | 98  | 13 | 3.80 | $8.50 \times 10^{-3}$ |
| Positive regulation of phagocytosis             | 76  | 10 | 3.70 | $3.64 \times 10^{-2}$ |
| Extracellular matrix organization               | 280 | 31 | 3.10 | $3.30 \times 10^{-5}$ |
| Cell-substrate adhesion                         | 194 | 19 | 2.80 | $1.01 \times 10^{-2}$ |
| Positive regulation of leukocyte migration      | 152 | 15 | 2.80 | $3.37 \times 10^{-2}$ |
| Vasculature development                         | 532 | 46 | 2.40 | $3.83 \times 10^{-5}$ |
| Positive regulation of cell-cell adhesion       | 324 | 27 | 2.40 | $7.19 \times 10^{-3}$ |
| Positive regulation of cytokine production      | 481 | 37 | 2.20 | $2.74 \times 10^{-3}$ |
| Actin cytoskeleton organization                 | 549 | 40 | 2.10 | $4.26 \times 10^{-3}$ |
| Ubiquitin-dependent protein catabolic process   | 575 | 6  | 0.30 | $2.55 \times 10^{-2}$ |
| DNA repair                                      | 508 | 3  | 0.17 | $3.83 \times 10^{-3}$ |
| Translation                                     | 379 | 2  | 0.15 | $1.90 \times 10^{-2}$ |
| Ribonucleoprotein complex biogenesis            | 449 | 2  | 0.13 | $3.83 \times 10^{-3}$ |
| RNA processing                                  | 868 | 3  | 0.10 | $2.92 \times 10^{-7}$ |
| Autophagy                                       | 303 | 1  | 0.10 | $3.39 \times 10^{-2}$ |

**Supplementary Table S20.** Biological processes which involve genes that are differentially expressed in human coronary artery endothelial cells (HCAEC) and human internal thoracic artery endothelial cells (HITAEC) cultured under laminar flow, according to the Reactome database.

| Reactome pathway                                                | Total genes | Differentially expressed genes | Fold enrichment | FDR-corrected <i>p</i> value |
|-----------------------------------------------------------------|-------------|--------------------------------|-----------------|------------------------------|
| <b>Primary human coronary artery endothelial cells</b>          |             |                                |                 |                              |
| Cell-cell junction organization                                 | 64          | 12                             | 4.50            | $1.16 \times 10^{-2}$        |
| Collagen biosynthesis and modifying enzymes                     | 67          | 12                             | 4.30            | $1.41 \times 10^{-2}$        |
| Collagen formation                                              | 89          | 13                             | 3.50            | $3.49 \times 10^{-2}$        |
| <b>Primary human internal thoracic artery endothelial cells</b> |             |                                |                 |                              |
| Glycosaminoglycan metabolism                                    | 123         | 16                             | 3.70            | $1.07 \times 10^{-2}$        |

**Supplementary Table S21.** Biological processes which involve genes that are differentially expressed in human coronary artery endothelial cells (HCAEC) and human internal thoracic artery endothelial cells (HITAEC) cultured under laminar flow, according to the Kyoto Encyclopedia of Genes and Genomes (KEGG) database.

| Pathway                                                         | Total genes | Percent from differentially expressed genes | Fold enrichment | FDR-corrected <i>p</i> value |
|-----------------------------------------------------------------|-------------|---------------------------------------------|-----------------|------------------------------|
| <b>Primary human coronary artery endothelial cells</b>          |             |                                             |                 |                              |
| Cell adhesion                                                   | 69          | 7.2                                         | 3.70            | $3.00 \times 10^{-19}$       |
| Calcium transport                                               | 14          | 1.5                                         | 3.60            | $3.30 \times 10^{-3}$        |
| Sodium transport                                                | 14          | 1.5                                         | 3.00            | $1.60 \times 10^{-2}$        |
| Ion transport                                                   | 57          | 5.9                                         | 2.30            | $6.10 \times 10^{-7}$        |
| Differentiation                                                 | 52          | 5.4                                         | 1.80            | $1.90 \times 10^{-3}$        |
| <b>Primary human internal thoracic artery endothelial cells</b> |             |                                             |                 |                              |
| Cell adhesion                                                   | 36          | 4.5                                         | 2.30            | $4.00 \times 10^{-4}$        |

**Supplementary Table S22.** Biochemical pathways which involve genes that are differentially expressed in human coronary artery endothelial cells (HCAEC) and human internal thoracic artery endothelial cells (HITAEC) cultured under laminar flow, according to the Kyoto Encyclopedia of Genes and Genomes (KEGG) database.

| Pathway                                                         | Total genes | Percent from differentially expressed genes | Fold enrichment | FDR-corrected <i>p</i> value |
|-----------------------------------------------------------------|-------------|---------------------------------------------|-----------------|------------------------------|
| <b>Primary human coronary artery endothelial cells</b>          |             |                                             |                 |                              |
| Cell adhesion molecules                                         | 24          | 2.5                                         | 3.60            | $2.30 \times 10^{-5}$        |
| Protein digestion and absorption                                | 13          | 1.3                                         | 3.00            | $4.50 \times 10^{-2}$        |
| cAMP signaling pathway                                          | 24          | 2.5                                         | 2.60            | $3.20 \times 10^{-3}$        |
| Calcium signaling pathway                                       | 25          | 2.6                                         | 2.40            | $3.50 \times 10^{-3}$        |
| <b>Primary human internal thoracic artery endothelial cells</b> |             |                                             |                 |                              |
| ECM-receptor interaction                                        | 13          | 1.6                                         | 3.90            | $2.30 \times 10^{-2}$        |



|                                   |    |     |      |                       |
|-----------------------------------|----|-----|------|-----------------------|
| Phospholipase D signaling pathway | 16 | 2.0 | 2.90 | $2.90 \times 10^{-2}$ |
| Focal adhesion                    | 20 | 2.5 | 2.60 | $2.30 \times 10^{-2}$ |
| Calcium signaling pathway         | 22 | 2.7 | 2.40 | $2.30 \times 10^{-2}$ |

### TRANSCRIPTOMIC PROFILING AT STATIC CELL CULTURE CONDITIONS

**Supplementary Table S23.** Molecular terms (selected from Gene Ontology (GO), UniProtKB Keywords, Reactome, and Kyoto Encyclopedia of Genes and Genomes (KEGG) databases) common for human coronary artery endothelial cells (HCAEC) and human internal thoracic artery endothelial cells (HITAEC) cultured under static conditions according to the RNA sequencing and pathway enrichment analysis. Gene Ontology database has been screened by cellular components (CC), molecular function (MF), and biological process (BP) domains.

| Molecular term                                                  | Total genes | Differentially expressed genes | Fold enrichment | FDR-corrected <i>p</i> value |
|-----------------------------------------------------------------|-------------|--------------------------------|-----------------|------------------------------|
| <b>Primary human coronary artery endothelial cells</b>          |             |                                |                 |                              |
| Collagen-containing extracellular matrix (GO CC)                | 434         | 32                             | 2.40            | $2.51 \times 10^{-3}$        |
| Extracellular matrix (GO CC)                                    | 575         | 35                             | 2.00            | $3.30 \times 10^{-2}$        |
| Cell junction assembly (GO BP)                                  | 276         | 21                             | 2.50            | $1.59 \times 10^{-2}$        |
| Cell junction (UniProtKB Keywords)                              | 50          | 7                              | 1.90            | $6.1 \times 10^{-4}$         |
| Extracellular vesicle (GO CC)                                   | 2123        | 92                             | 1.40            | $4.87 \times 10^{-2}$        |
| Secreted (UniProtKB Keywords)                                   | 91          | 13                             | 1.40            | $3.8 \times 10^{-3}$         |
| <b>Primary human internal thoracic artery endothelial cells</b> |             |                                |                 |                              |
| Collagen-containing extracellular matrix (GO CC)                | 434         | 32                             | 1.90            | $3.14 \times 10^{-2}$        |
| Extracellular matrix (GO CC)                                    | 575         | 42                             | 1.90            | $1.13 \times 10^{-2}$        |
| Cell-matrix adhesion (GO BP)                                    | 135         | 15                             | 2.80            | $4.51 \times 10^{-2}$        |
| Cell junction (UniProtKB Keywords)                              | 56          | 6                              | 1.60            | $5.2 \times 10^{-3}$         |
| Secretory vesicle (GO CC)                                       | 1051        | 64                             | 1.50            | $2.50 \times 10^{-2}$        |
| Secreted (UniProtKB Keywords)                                   | 127         | 14                             | 1.50            | $1.3 \times 10^{-4}$         |

**Supplementary Table S24.** Molecular terms (selected from Gene Ontology (GO), UniProtKB Keywords, Reactome, and Kyoto Encyclopedia of Genes and Genomes (KEGG) databases) specific for human coronary artery endothelial cells (HCAEC) cultured under

static conditions according to the RNA sequencing and pathway enrichment analysis. Gene Ontology database has been screened by cellular components (CC), molecular function (MF), and biological process (BP) domains.

| Molecular term                                            | Total genes | Differentially expressed genes | Fold enrichment | FDR-corrected <i>p</i> value |
|-----------------------------------------------------------|-------------|--------------------------------|-----------------|------------------------------|
| Artery development (GO BP)                                | 95          | 11                             | 3.90            | $2.19 \times 10^{-2}$        |
| Vasculature development (GO BP)                           | 532         | 41                             | 2.60            | $7.67 \times 10^{-5}$        |
| Cellular nitrogen compound biosynthetic process (GO BP)   | 1588        | 26                             | 0.50            | $4.30 \times 10^{-2}$        |
| Proteolysis involved in protein catabolic process (GO BP) | 647         | 6                              | 0.30            | $4.92 \times 10^{-2}$        |

**Supplementary Table S25.** Molecular terms (selected from Gene Ontology (GO), UniProtKB Keywords, Reactome, and Kyoto Encyclopedia of Genes and Genomes (KEGG) databases) specific for human internal thoracic artery endothelial cells (HITAEC) cultured under static conditions according to the RNA sequencing and pathway enrichment analysis. Gene Ontology database has been screened by cellular components (CC), molecular function (MF), and biological process (BP) domains.

| Molecular term                             | Total genes | Differentially expressed genes | Fold enrichment | FDR-corrected <i>p</i> value |
|--------------------------------------------|-------------|--------------------------------|-----------------|------------------------------|
| Early endosome (GO CC)                     | 415         | 32                             | 2.00            | $1.85 \times 10^{-2}$        |
| Endosome (GO CC)                           | 1036        | 69                             | 1.70            | $3.38 \times 10^{-3}$        |
| Lysosome (GO CC)                           | 749         | 53                             | 1.80            | $5.70 \times 10^{-3}$        |
| Inflammatory response (GO BP)              | 540         | 40                             | 1.90            | $2.32 \times 10^{-2}$        |
| Macromolecule biosynthetic process (GO BP) | 1487        | 31                             | 0.50            | $1.11 \times 10^{-2}$        |
| DNA repair (GO BP)                         | 508         | 5                              | 0.25            | $1.64 \times 10^{-2}$        |
| RNA processing (GO BP)                     | 868         | 4                              | 0.12            | $8.31 \times 10^{-7}$        |
| RNA splicing (GO BP)                       | 368         | 1                              | 0.07            | $4.40 \times 10^{-3}$        |
| Ribosome biogenesis (GO BP)                | 303         | 1                              | 0.08            | $2.01 \times 10^{-2}$        |
| Translation (GO BP)                        | 379         | 2                              | 0.13            | $1.29 \times 10^{-2}$        |

**Supplementary Table S26.** Differentially expressed genes across the cellular compartments in human coronary artery endothelial cells (HCAEC) and human internal thoracic artery endothelial cells (HITAEC) cultured under static conditions, according to the Gene Ontology Cellular Component database.

| Gene Ontology term                                              | Total genes | Differentially expressed genes | Fold enrichment | FDR-corrected <i>p</i> value |
|-----------------------------------------------------------------|-------------|--------------------------------|-----------------|------------------------------|
| <b>Primary human coronary artery endothelial cells</b>          |             |                                |                 |                              |
| Collagen-containing extracellular matrix                        | 434         | 32                             | 2.40            | $2.51 \times 10^{-3}$        |
| Cell-cell junction                                              | 508         | 32                             | 2.10            | $2.96 \times 10^{-2}$        |
| Extracellular matrix                                            | 575         | 35                             | 2.00            | $3.30 \times 10^{-2}$        |
| Extracellular vesicle                                           | 2123        | 92                             | 1.40            | $4.87 \times 10^{-2}$        |
| <b>Primary human internal thoracic artery endothelial cells</b> |             |                                |                 |                              |
| Laminin complex                                                 | 12          | 5                              | 10.60           | $1.18 \times 10^{-2}$        |
| Cortical cytoskeleton                                           | 111         | 14                             | 3.20            | $1.12 \times 10^{-2}$        |
| Phagocytic vesicle                                              | 140         | 14                             | 2.50            | $4.91 \times 10^{-2}$        |
| Early endosome                                                  | 415         | 32                             | 2.00            | $1.85 \times 10^{-2}$        |
| Collagen-containing extracellular matrix                        | 434         | 32                             | 1.90            | $3.14 \times 10^{-2}$        |
| Extracellular matrix                                            | 575         | 42                             | 1.90            | $1.13 \times 10^{-2}$        |
| Lysosome                                                        | 749         | 53                             | 1.80            | $5.70 \times 10^{-3}$        |
| Endosome                                                        | 1036        | 69                             | 1.70            | $3.38 \times 10^{-3}$        |
| Secretory vesicle                                               | 1051        | 64                             | 1.50            | $2.50 \times 10^{-2}$        |
| Anchoring junction                                              | 1336        | 76                             | 1.50            | $4.23 \times 10^{-2}$        |

**Supplementary Table S27.** Differentially expressed genes across the cellular compartments in human coronary artery endothelial cells (HCAEC) and human internal thoracic artery endothelial cells (HITAEC) cultured under static conditions, according to the UniProtKB Keywords database.

| Pathway | Total genes | Percent from differentially expressed genes | Fold enrichment | FDR-corrected <i>p</i> value |
|---------|-------------|---------------------------------------------|-----------------|------------------------------|
|---------|-------------|---------------------------------------------|-----------------|------------------------------|

| Primary human coronary artery endothelial cells          |     |      |      |                       |
|----------------------------------------------------------|-----|------|------|-----------------------|
| Extracellular matrix                                     | 22  | 3.2  | 2.70 | $1.60 \times 10^{-3}$ |
| Cell junction                                            | 50  | 7.2  | 1.90 | $6.10 \times 10^{-4}$ |
| Secreted                                                 | 91  | 13.1 | 1.40 | $3.80 \times 10^{-3}$ |
| Cell membrane                                            | 149 | 21.5 | 1.30 | $3.80 \times 10^{-3}$ |
| Primary human internal thoracic artery endothelial cells |     |      |      |                       |
| Lysosome                                                 | 27  | 3.0  | 1.80 | $3.00 \times 10^{-2}$ |
| Cell junction                                            | 56  | 6.3  | 1.60 | $5.20 \times 10^{-3}$ |
| Endosome                                                 | 41  | 4.6  | 1.60 | $2.80 \times 10^{-2}$ |
| Secreted                                                 | 127 | 14.2 | 1.50 | $1.30 \times 10^{-4}$ |
| Cell membrane                                            | 197 | 22.1 | 1.30 | $1.10 \times 10^{-3}$ |

**Supplementary Table S28.** Molecular functions of genes which are differentially expressed human coronary artery endothelial cells (HCAEC) and human internal thoracic artery endothelial cells (HITAEC) cultured under static conditions, according to the Gene Ontology Molecular Function database.

| Gene Ontology term                                       | Total genes | Differentially expressed genes | Fold enrichment | FDR-corrected <i>p</i> value |
|----------------------------------------------------------|-------------|--------------------------------|-----------------|------------------------------|
| Primary human coronary artery endothelial cells          |             |                                |                 |                              |
| Actin filament binding                                   | 222         | 21                             | 3.10            | $2.50 \times 10^{-2}$        |
| Calcium ion binding                                      | 735         | 45                             | 2.00            | $2.82 \times 10^{-2}$        |
| Signaling receptor binding                               | 1602        | 82                             | 1.70            | $2.46 \times 10^{-2}$        |
| Primary human internal thoracic artery endothelial cells |             |                                |                 |                              |
| Carbohydrate derivative binding                          | 2287        | 131                            | 1.50            | $1.26 \times 10^{-2}$        |
| RNA binding                                              | 1666        | 29                             | 0.44            | $4.77 \times 10^{-4}$        |

**Supplementary Table S29.** Molecular functions of genes which are differentially expressed human coronary artery endothelial cells (HCAEC) and human internal thoracic artery endothelial cells (HITAEC) cultured under static conditions, according to the UniProtKB Keywords database.

| Pathway                                                         | Total genes | Percent from differentially expressed genes | Fold enrichment | FDR-corrected <i>p</i> value |
|-----------------------------------------------------------------|-------------|---------------------------------------------|-----------------|------------------------------|
| <b>Primary human coronary artery endothelial cells</b>          |             |                                             |                 |                              |
| Growth factor                                                   | 14          | 2.0                                         | 3.50            | $4.30 \times 10^{-3}$        |
| <b>Primary human internal thoracic artery endothelial cells</b> |             |                                             |                 |                              |
| None                                                            |             |                                             |                 |                              |

**Supplementary Table S30.** Biological processes which involve genes that are differentially expressed in human coronary artery endothelial cells (HCAEC) and human internal thoracic artery endothelial cells (HITAEC) cultured under static conditions, according to the Gene Ontology Biological Process database.

| Gene Ontology term                                       | Total genes | Differentially expressed genes | Fold enrichment | FDR-corrected <i>p</i> value |
|----------------------------------------------------------|-------------|--------------------------------|-----------------|------------------------------|
| <b>Primary human coronary artery endothelial cells</b>   |             |                                |                 |                              |
| Regulation of transforming growth factor beta production | 39          | 7                              | 6.00            | $2.60 \times 10^{-2}$        |
| Endothelial cell migration                               | 73          | 9                              | 4.10            | $4.17 \times 10^{-2}$        |
| Artery development                                       | 95          | 11                             | 3.90            | $2.19 \times 10^{-2}$        |
| Cell-cell junction organization                          | 176         | 18                             | 3.40            | $2.80 \times 10^{-3}$        |
| Negative regulation of cell motility                     | 303         | 25                             | 2.70            | $2.45 \times 10^{-3}$        |
| Vasculature development                                  | 532         | 41                             | 2.60            | $7.67 \times 10^{-5}$        |
| Cell junction assembly                                   | 276         | 21                             | 2.50            | $1.59 \times 10^{-2}$        |
| Regulation of Wnt signaling pathway                      | 332         | 24                             | 2.40            | $1.45 \times 10^{-2}$        |
| Cell junction organization                               | 498         | 35                             | 2.30            | $1.88 \times 10^{-3}$        |
| Actin cytoskeleton organization                          | 549         | 36                             | 2.20            | $4.07 \times 10^{-3}$        |
| Cell-cell adhesion                                       | 543         | 33                             | 2.00            | $1.90 \times 10^{-2}$        |
| Positive regulation of cell differentiation              | 884         | 52                             | 2.00            | $1.84 \times 10^{-3}$        |
| Cellular nitrogen compound biosynthetic process          | 1588        | 26                             | 0.50            | $4.30 \times 10^{-2}$        |
| Proteolysis involved in protein catabolic process        | 647         | 6                              | 0.30            | $4.92 \times 10^{-2}$        |
| Ubiquitin-dependent protein catabolic process            | 575         | 4                              | 0.23            | $2.68 \times 10^{-2}$        |

| Primary human internal thoracic artery endothelial cells   |      |    |      |                       |
|------------------------------------------------------------|------|----|------|-----------------------|
| Blood vessel diameter maintenance                          | 144  | 16 | 2.80 | $3.24 \times 10^{-2}$ |
| Cell-matrix adhesion                                       | 135  | 15 | 2.80 | $4.51 \times 10^{-2}$ |
| Positive regulation of cell-cell adhesion                  | 324  | 34 | 2.70 | $3.87 \times 10^{-4}$ |
| Positive regulation of cell adhesion                       | 488  | 49 | 2.60 | $2.37 \times 10^{-5}$ |
| Positive regulation of I-kappaB kinase/NF-kappaB signaling | 190  | 19 | 2.50 | $3.21 \times 10^{-2}$ |
| Positive regulation of cytokine production                 | 481  | 37 | 2.00 | $2.31 \times 10^{-2}$ |
| Positive regulation of cell motility                       | 558  | 44 | 2.00 | $5.32 \times 10^{-3}$ |
| Inflammatory response                                      | 540  | 40 | 1.90 | $2.32 \times 10^{-2}$ |
| Cell adhesion                                              | 969  | 66 | 1.70 | $5.97 \times 10^{-3}$ |
| Macromolecule biosynthetic process                         | 1487 | 31 | 0.50 | $1.11 \times 10^{-2}$ |
| DNA repair                                                 | 508  | 5  | 0.25 | $1.64 \times 10^{-2}$ |
| Translation                                                | 379  | 2  | 0.13 | $1.29 \times 10^{-2}$ |
| RNA processing                                             | 868  | 4  | 0.12 | $8.31 \times 10^{-7}$ |
| Ribosome biogenesis                                        | 303  | 1  | 0.08 | $2.01 \times 10^{-2}$ |
| RNA splicing                                               | 368  | 1  | 0.07 | $4.40 \times 10^{-3}$ |

**Supplementary Table S31.** Biological processes which involve genes that are differentially expressed in human coronary artery endothelial cells (HCAEC) and human internal thoracic artery endothelial cells (HITAEC) cultured under static conditions, according to the Reactome database.

| Reactome pathway                                         | Total genes | Differentially expressed genes | Fold enrichment | FDR-corrected <i>p</i> value |
|----------------------------------------------------------|-------------|--------------------------------|-----------------|------------------------------|
| Primary human coronary artery endothelial cells          |             |                                |                 |                              |
| None                                                     |             |                                |                 |                              |
| Primary human internal thoracic artery endothelial cells |             |                                |                 |                              |
| None                                                     |             |                                |                 |                              |

**Supplementary Table S32.** Biological processes which involve genes that are differentially expressed in human coronary artery endothelial cells (HCAEC) and human internal thoracic artery endothelial cells (HITAEC) cultured under static conditions, according to the Kyoto Encyclopedia of Genes and Genomes (KEGG) database.

| Pathway                                                         | Total genes | Percent from differentially expressed genes | Fold enrichment | FDR-corrected <i>p</i> value |
|-----------------------------------------------------------------|-------------|---------------------------------------------|-----------------|------------------------------|
| <b>Primary human coronary artery endothelial cells</b>          |             |                                             |                 |                              |
| Cell adhesion                                                   | 36          | 5.2                                         | 2.80            | $8.00 \times 10^{-6}$        |
| <b>Primary human internal thoracic artery endothelial cells</b> |             |                                             |                 |                              |
| Innate immunity                                                 | 37          | 4.1                                         | 2.50            | $6.70 \times 10^{-5}$        |
| Cell adhesion                                                   | 36          | 4.0                                         | 1.90            | $8.70 \times 10^{-3}$        |
| Immunity                                                        | 56          | 6.3                                         | 1.60            | $8.70 \times 10^{-3}$        |

**Supplementary Table S33.** Biochemical pathways which involve genes that are differentially expressed in human coronary artery endothelial cells (HCAEC) and human internal thoracic artery endothelial cells (HITAEC) cultured under static conditions, according to the Kyoto Encyclopedia of Genes and Genomes (KEGG) database.

| Pathway                                                         | Total genes | Percent from differentially expressed genes | Fold enrichment | FDR-corrected <i>p</i> value |
|-----------------------------------------------------------------|-------------|---------------------------------------------|-----------------|------------------------------|
| <b>Primary human coronary artery endothelial cells</b>          |             |                                             |                 |                              |
| None                                                            |             |                                             |                 |                              |
| <b>Primary human internal thoracic artery endothelial cells</b> |             |                                             |                 |                              |
| Cell adhesion molecules                                         | 21          | 2.4                                         | 2.90            | $1.10 \times 10^{-2}$        |
| Phagosome                                                       | 20          | 2.2                                         | 2.80            | $1.20 \times 10^{-2}$        |
| Calcium signaling pathway                                       | 24          | 2.7                                         | 2.10            | $4.70 \times 10^{-2}$        |

## BIOINFORMATIC ANALYSIS OF HCAEC-HITAEC INTERACTOME

**Supplementary Table S34.** Molecular categories enriched in interacting proteins which are differentially expressed in human coronary artery endothelial cells (HCAEC) and human internal thoracic artery endothelial cells (HITAEC), according to the Gene Ontology (Cellular Component, Molecular Function, and Biological Process), UniProtKB Keywords, Reactome, and Kyoto Encyclopedia of Genes and Genomes (KEGG) databases (analysed by the Database for Annotation, Visualization and Integrated Discovery (DAVID)).

| Bioinformatic term                                                        | Total proteins | Percent from differentially expressed proteins | Fold enrichment | FDR-corrected <i>p</i> value |
|---------------------------------------------------------------------------|----------------|------------------------------------------------|-----------------|------------------------------|
| Cell cycle, mitotic (Reactome)                                            | 27             | 10.1                                           | 2.20            | $3.30 \times 10^{-3}$        |
| DNA replication (Reactome)                                                | 22             | 8.2                                            | 5.30            | $3.50 \times 10^{-8}$        |
| Signaling by NOTCH (Reactome)                                             | 21             | 7.9                                            | 4.00            | $5.10 \times 10^{-6}$        |
| Pre-NOTCH transcription and translation (Reactome)                        | 17             | 6.4                                            | 8.30            | $6.60 \times 10^{-9}$        |
| Pre-NOTCH expression and processing (Reactome)                            | 17             | 6.4                                            | 7.00            | $5.70 \times 10^{-8}$        |
| Cell junction (GO CC)                                                     | 14             | 5.2                                            | 2.50            | $2.70 \times 10^{-2}$        |
| Cell surface interactions at the vascular wall (Reactome)                 | 13             | 4.9                                            | 4.20            | $7.10 \times 10^{-4}$        |
| Angiogenesis (GO BP)                                                      | 10             | 3.7                                            | 2.90            | $3.60 \times 10^{-1}$        |
| Adherens junction (GO CC)                                                 | 8              | 3.0                                            | 3.40            | $8.90 \times 10^{-2}$        |
| Positive regulation of endothelial cell migration (GO BP)                 | 7              | 2.6                                            | 7.60            | $3.80 \times 10^{-2}$        |
| Basement membrane (GO CC)                                                 | 7              | 2.6                                            | 5.70            | $2.30 \times 10^{-2}$        |
| Cell-matrix adhesion (GO BP)                                              | 7              | 2.6                                            | 4.70            | $2.50 \times 10^{-1}$        |
| Cell-cell junction (GO CC)                                                | 7              | 2.6                                            | 2.80            | $2.10 \times 10^{-1}$        |
| Elastic fibre formation (Reactome)                                        | 6              | 2.2                                            | 6.10            | $2.40 \times 10^{-2}$        |
| Positive regulation of endothelial cell proliferation (GO BP)             | 6              | 2.2                                            | 5.80            | $2.40 \times 10^{-1}$        |
| Positive regulation of nitric-oxide synthase biosynthetic process (GO BP) | 4              | 1.5                                            | 16.2            | $1.50 \times 10^{-1}$        |
| Positive regulation of blood vessel endothelial cell migration (GO BP)    | 4              | 1.5                                            | 5.90            | $7.20 \times 10^{-1}$        |
| Endothelial tube morphogenesis (GO BP)                                    | 3              | 1.1                                            | 24.2            | $3.30 \times 10^{-1}$        |
| Establishment of endothelial barrier (GO BP)                              | 3              | 1.1                                            | 10.40           | $7.60 \times 10^{-1}$        |
| Basement membrane organization (GO BP)                                    | 3              | 1.1                                            | 9.90            | $7.90 \times 10^{-1}$        |



**Supplementary Table S35.** Molecular categories enriched in interacting proteins which are differentially expressed in human coronary artery endothelial cells (HCAEC) and human internal thoracic artery endothelial cells (HITAEC), according to the Gene Ontology (Cellular Component, Molecular Function, and Biological Process), UniProtKB Keywords, Reactome, and Kyoto Encyclopedia of Genes and Genomes (KEGG) databases (analysed by stringApp within the Cytoscape framework).

| Bioinformatic term                                                        | Total proteins | Percent from differentially expressed proteins | Background proteins | FDR-corrected <i>p</i> value |
|---------------------------------------------------------------------------|----------------|------------------------------------------------|---------------------|------------------------------|
| Anchoring junction (GO CC)                                                | 44             | 17.32                                          | 1325                | $5.86 \times 10^{-7}$        |
| Cell-substrate junction (GO CC)                                           | 30             | 11.81                                          | 426                 | $+2.20 \times 10^{-11}$      |
| Focal adhesion (GO CC)                                                    | 29             | 11.42                                          | 416                 | $5.88 \times 10^{-11}$       |
| Positive regulation of cell adhesion (GO BP)                              | 21             | 8.27                                           | 485                 | $4.80 \times 10^{-4}$        |
| Cell-cell junction (GO CC)                                                | 17             | 6.69                                           | 499                 | $6.70 \times 10^{-3}$        |
| Blood vessel morphogenesis (GO BP)                                        | 16             | 6.30                                           | 419                 | $1.82 \times 10^{-2}$        |
| Angiogenesis (GO BP)                                                      | 15             | 5.91                                           | 325                 | $5.10 \times 10^{-3}$        |
| Cell surface interactions at the vascular wall (Reactome)                 | 13             | 5.12                                           | 139                 | $8.03 \times 10^{-6}$        |
| Positive regulation of endothelial cell migration (GO BP)                 | 9              | 3.54                                           | 107                 | $3.00 \times 10^{-3}$        |
| Tight junction (KEGG)                                                     | 9              | 3.54                                           | 157                 | $3.20 \times 10^{-3}$        |
| Cell-matrix adhesion (GO BP)                                              | 9              | 3.54                                           | 136                 | $1.28 \times 10^{-2}$        |
| Signaling by NOTCH (Reactome)                                             | 9              | 3.54                                           | 204                 | $2.39 \times 10^{-2}$        |
| Endothelium development (GO BP)                                           | 8              | 3.15                                           | 98                  | $8.50 \times 10^{-3}$        |
| Adherens junction (GO CC)                                                 | 8              | 3.15                                           | 177                 | $3.38 \times 10^{-2}$        |
| Basement membrane (GO CC)                                                 | 7              | 2.76                                           | 98                  | $7.40 \times 10^{-3}$        |
| Elastic fibre formation (Reactome)                                        | 6              | 2.36                                           | 44                  | $1.20 \times 10^{-3}$        |
| VEGFA-VEGFR2 pathway (Reactome)                                           | 6              | 2.36                                           | 96                  | $2.70 \times 10^{-2}$        |
| Pre-NOTCH transcription and translation (Reactome)                        | 5              | 1.97                                           | 62                  | $2.36 \times 10^{-2}$        |
| Cell adhesion mediated by integrin (GO BP)                                | 5              | 1.97                                           | 42                  | $3.08 \times 10^{-2}$        |
| Positive regulation of nitric-oxide synthase biosynthetic process (GO BP) | 4              | 1.57                                           | 18                  | $1.83 \times 10^{-2}$        |

**Supplementary Table S36.** Molecular categories enriched in interacting proteins which are differentially expressed in human coronary artery endothelial cells (HCAEC) and human internal thoracic artery endothelial cells (HITAEC) cultured under laminar flow, according to

the Gene Ontology (Cellular Component, Molecular Function, and Biological Process), UniProtKB Keywords, Reactome, and Kyoto Encyclopedia of Genes and Genomes (KEGG) databases (analysed by the Database for Annotation, Visualization and Integrated Discovery (DAVID)).

| Bioinformatic term                                                           | Total genes | Percent from differentially expressed genes | Fold enrichment | FDR-corrected <i>p</i> value |
|------------------------------------------------------------------------------|-------------|---------------------------------------------|-----------------|------------------------------|
| Angiogenesis (GO BP)                                                         | 33          | 6.4                                         | 4.9             | $2.0 \times 10^{-10}$        |
| Cell junction (UniProtKB Keywords)                                           | 32          | 6.2                                         | 2.9             | $1.80 \times 10^{-6}$        |
| Focal adhesion (KEGG)                                                        | 32          | 6.2                                         | 3.5             | $9.10 \times 10^{-8}$        |
| Cell-cell adhesion (GO BP)                                                   | 22          | 4.2                                         | 4.3             | $8.20 \times 10^{-6}$        |
| Cell-matrix adhesion (GO BP)                                                 | 19          | 3.7                                         | 6.6             | $1.70 \times 10^{-7}$        |
| Positive regulation of angiogenesis (GO BP)                                  | 19          | 3.7                                         | 4.4             | $4.30 \times 10^{-5}$        |
| Cell surface interactions at the vascular wall (Reactome)                    | 15          | 2.9                                         | 2.7             | $2.90 \times 10^{-2}$        |
| Gap junction (KEGG)                                                          | 13          | 2.5                                         | 3.2             | $3.40 \times 10^{-3}$        |
| Cell-cell junction (GO CC)                                                   | 13          | 2.5                                         | 2.7             | $2.20 \times 10^{-2}$        |
| Elastic fibre formation (Reactome)                                           | 10          | 1.9                                         | 5.7             | $2.30 \times 10^{-3}$        |
| Basement membrane (GO CC)                                                    | 10          | 1.9                                         | 4.2             | $5.40 \times 10^{-3}$        |
| Positive regulation of endothelial cell proliferation (GO BP)                | 10          | 1.9                                         | 5.1             | $5.50 \times 10^{-3}$        |
| Positive regulation of cell adhesion (GO BP)                                 | 9           | 1.7                                         | 5.8             | $5.50 \times 10^{-3}$        |
| Molecules associated with elastic fibres (Reactome)                          | 9           | 1.7                                         | 6.1             | $3.50 \times 10^{-3}$        |
| Bicellular tight junction (GO CC)                                            | 8           | 1.5                                         | 2.5             | $2.20 \times 10^{-1}$        |
| Positive regulation of endothelial cell migration (GO BP)                    | 8           | 1.5                                         | 4.5             | $3.70 \times 10^{-2}$        |
| Notch signaling pathway (GO BP)                                              | 8           | 1.5                                         | 2.6             | $2.90 \times 10^{-1}$        |
| Positive regulation of vascular endothelial growth factor production (GO BP) | 7           | 1.4                                         | 8.9             | $4.60 \times 10^{-3}$        |
| Sprouting angiogenesis (GO BP)                                               | 7           | 1.4                                         | 7.8             | $7.50 \times 10^{-3}$        |
| Nitric oxide stimulates guanylate cyclase (Reactome)                         | 6           | 1.2                                         | 6.8             | $3.30 \times 10^{-2}$        |
| Positive regulation of nitric oxide biosynthetic process (GO BP)             | 6           | 1.2                                         | 5.0             | $9.80 \times 10^{-2}$        |
| Anchoring junction (GO CC)                                                   | 5           | 1.0                                         | 4.5             | $1.40 \times 10^{-1}$        |
| Elastic fiber assembly (GO BP)                                               | 5           | 1.0                                         | 15.8            | $6.70 \times 10^{-3}$        |
| Nitric-oxide synthase binding (GO MF)                                        | 4           | 0.8                                         | 9.9             | $1.10 \times 10^{-1}$        |

|                                                      |   |     |      |                       |
|------------------------------------------------------|---|-----|------|-----------------------|
| Nitric oxide mediated signal transduction (GO BP)    | 4 | 0.8 | 7.6  | $1.60 \times 10^{-1}$ |
| Establishment of endothelial barrier (GO BP)         | 4 | 0.8 | 7.2  | $1.80 \times 10^{-1}$ |
| Regulation of nitric-oxide synthase activity (GO BP) | 3 | 0.6 | 12.7 | $2.10 \times 10^{-1}$ |

**Supplementary Table S37.** Molecular categories enriched in interacting proteins which are differentially expressed in human coronary artery endothelial cells (HCAEC) and human internal thoracic artery endothelial cells (HITAEC) cultured under laminar flow, according to the Gene Ontology (Cellular Component, Molecular Function, and Biological Process), UniProtKB Keywords, Reactome, and Kyoto Encyclopedia of Genes and Genomes (KEGG) databases (analysed by stringApp within the Cytoscape framework).

| Bioinformatic term                                            | Total genes | Percent from differentially expressed genes | Background genes | FDR-corrected p value  |
|---------------------------------------------------------------|-------------|---------------------------------------------|------------------|------------------------|
| Cell junction (GO CC)                                         | 153         | 7,23%                                       | 2115             | $3.52 \times 10^{-28}$ |
| Anchoring junction (GO CC)                                    | 97          | 7,32%                                       | 1325             | $4.75 \times 10^{-17}$ |
| Cell adhesion (GO BP)                                         | 91          | 9,43%                                       | 965              | $1.35 \times 10^{-22}$ |
| Vasculature development (GO BP)                               | 61          | 11,57%                                      | 527              | $1.73 \times 10^{-18}$ |
| Cell-cell adhesion (GO BP)                                    | 57          | 10,52%                                      | 542              | $1.47 \times 10^{-15}$ |
| Positive regulation of cell adhesion (GO BP)                  | 47          | 9,69%                                       | 485              | $1.33 \times 10^{-11}$ |
| Angiogenesis (GO BP)                                          | 43          | 13,23%                                      | 325              | $1.15 \times 10^{-14}$ |
| Cell-cell junction (GO CC)                                    | 34          | 6,81%                                       | 499              | $2.94 \times 10^{-5}$  |
| Focal adhesion (KEGG)                                         | 32          | 16,41%                                      | 195              | $3.24 \times 10^{-13}$ |
| Positive regulation of cell-cell adhesion (GO BP)             | 30          | 9,32%                                       | 322              | $4.95 \times 10^{-7}$  |
| Cell-substrate adhesion (GO BP)                               | 25          | 12,82%                                      | 195              | $3.21 \times 10^{-8}$  |
| Cell junction assembly (GO BP)                                | 24          | 8,79%                                       | 273              | $2.80 \times 10^{-5}$  |
| Positive regulation of angiogenesis (GO BP)                   | 21          | 12,65%                                      | 166              | $7.48 \times 10^{-7}$  |
| Cell-matrix adhesion (GO BP)                                  | 20          | 14,71%                                      | 136              | $1.89 \times 10^{-7}$  |
| Cell surface interactions at the vascular wall (Reactome)     | 14          | 10,07%                                      | 139              | $1.60 \times 10^{-3}$  |
| Gap junction (KEGG)                                           | 13          | 14,94%                                      | 87               | $1.36 \times 10^{-5}$  |
| Positive regulation of endothelial cell proliferation (GO BP) | 13          | 13,54%                                      | 96               | $1.30 \times 10^{-4}$  |
| Positive regulation of endothelial cell migration (GO BP)     | 13          | 12,15%                                      | 107              | $3.40 \times 10^{-4}$  |
| Basement membrane (GO CC)                                     | 11          | 11,22%                                      | 98               | $1.90 \times 10^{-3}$  |

|                                                                              |    |        |     |                       |
|------------------------------------------------------------------------------|----|--------|-----|-----------------------|
| Positive regulation of cell junction assembly (GO BP)                        | 11 | 10,58% | 104 | $3.50 \times 10^{-3}$ |
| Elastic fibre formation (Reactome)                                           | 10 | 22,73% | 44  | $6.70 \times 10^{-5}$ |
| Endothelium development (GO BP)                                              | 10 | 10,20% | 98  | $7.70 \times 10^{-3}$ |
| Tight junction (KEGG)                                                        | 10 | 6,37%  | 157 | $2.77 \times 10^{-2}$ |
| Molecules associated with elastic fibres (Reactome)                          | 9  | 24,32% | 37  | $1.30 \times 10^{-4}$ |
| Sprouting angiogenesis (GO BP)                                               | 9  | 15,52% | 58  | $1.20 \times 10^{-3}$ |
| Endothelial cell differentiation (GO BP)                                     | 8  | 9,76%  | 82  | $2.71 \times 10^{-2}$ |
| Positive regulation of vascular endothelial growth factor production (GO BP) | 7  | 24,14% | 29  | $7.40 \times 10^{-4}$ |
| Regulation of nitric-oxide synthase activity (GO BP)                         | 7  | 17,50% | 40  | $3.50 \times 10^{-3}$ |
| Nitric oxide stimulates guanylate cyclase (Reactome)                         | 6  | 27,27% | 22  | $2.30 \times 10^{-3}$ |
| Positive regulation of nitric oxide biosynthetic process (GO BP)             | 6  | 13,95% | 43  | $2.07 \times 10^{-2}$ |
| Adherens junction (KEGG)                                                     | 6  | 8,70%  | 69  | $3.03 \times 10^{-2}$ |
| Elastic fiber assembly (GO BP)                                               | 5  | 41,67% | 12  | $1.20 \times 10^{-3}$ |
| Vascular endothelial growth factor signaling pathway (GO BP)                 | 5  | 23,81% | 21  | $7.80 \times 10^{-3}$ |
| Establishment of endothelial barrier (GO BP)                                 | 5  | 15,15% | 33  | $3.22 \times 10^{-2}$ |
| Nitric oxide mediated signal transduction (GO BP)                            | 4  | 19,05% | 21  | $3.99 \times 10^{-2}$ |

**Supplementary Table S38.** Molecular categories enriched in interacting proteins which are differentially expressed in human coronary artery endothelial cells (HCAEC) and human internal thoracic artery endothelial cells (HITAEC) cultured under static conditions, according to the Gene Ontology (Cellular Component, Molecular Function, and Biological Process), UniProtKB Keywords, Reactome, and Kyoto Encyclopedia of Genes and Genomes (KEGG) databases (analysed by the Database for Annotation, Visualization and Integrated Discovery (DAVID)).

| Bioinformatic term    | Total genes | Percent from differentially expressed genes | Fold enrichment | FDR-corrected <i>p</i> value |
|-----------------------|-------------|---------------------------------------------|-----------------|------------------------------|
| Cell adhesion (GO BP) | 42          | 9.0                                         | 3.1             | $3.20 \times 10^{-7}$        |
| Focal adhesion (KEGG) | 29          | 6.2                                         | 3.4             | $3.00 \times 10^{-6}$        |
| Cell junction (GO CC) | 18          | 3.8                                         | 1.8             | $1.10 \times 10^{-1}$        |

|                                                               |    |     |      |                       |
|---------------------------------------------------------------|----|-----|------|-----------------------|
| Signaling by NOTCH (Reactome)                                 | 17 | 3.6 | 2.0  | $1.60 \times 10^{-1}$ |
| Angiogenesis (GO BP)                                          | 16 | 3.4 | 2.6  | $3.70 \times 10^{-2}$ |
| Positive regulation of angiogenesis (GO BP)                   | 14 | 3.0 | 3.6  | $9.10 \times 10^{-3}$ |
| Cell-matrix adhesion (GO BP)                                  | 12 | 2.6 | 4.6  | $5.00 \times 10^{-3}$ |
| Cell-cell adhesion (GO BP)                                    | 12 | 2.6 | 2.6  | $1.30 \times 10^{-1}$ |
| Gap junction (KEGG)                                           | 11 | 2.3 | 3.0  | $3.80 \times 10^{-2}$ |
| Cell-cell junction (GO CC)                                    | 11 | 2.3 | 2.6  | $8.60 \times 10^{-2}$ |
| Pre-NOTCH expression and processing (Reactome)                | 9  | 1.9 | 2.3  | $3.00 \times 10^{-1}$ |
| Signaling by NOTCH4 (Reactome)                                | 8  | 1.7 | 2.7  | $2.50 \times 10^{-1}$ |
| Pre-NOTCH transcription and translation (Reactome)            | 8  | 1.7 | 2.4  | $3.20 \times 10^{-1}$ |
| Positive regulation of cell adhesion (GO BP)                  | 8  | 1.7 | 5.7  | $2.00 \times 10^{-2}$ |
| Nitric oxide stimulates guanylate cyclase (Reactome)          | 8  | 1.7 | 10.0 | $7.00 \times 10^{-4}$ |
| Basement membrane (GO CC)                                     | 8  | 1.7 | 3.7  | $5.50 \times 10^{-2}$ |
| Elastic fibre formation (Reactome)                            | 7  | 1.5 | 4.4  | $1.00 \times 10^{-1}$ |
| Positive regulation of endothelial cell proliferation (GO BP) | 6  | 1.3 | 3.4  | $3.30 \times 10^{-1}$ |
| Molecules associated with elastic fibres (Reactome)           | 6  | 1.3 | 4.5  | $1.60 \times 10^{-1}$ |
| Nitric oxide mediated signal transduction (GO BP)             | 4  | 0.9 | 8.4  | $1.70 \times 10^{-1}$ |

**Supplementary Table S39.** Molecular categories enriched in interacting proteins which are differentially expressed in human coronary artery endothelial cells (HCAEC) and human internal thoracic artery endothelial cells (HITAEC) cultured under static conditions, according to the Gene Ontology (Cellular Component, Molecular Function, and Biological Process), UniProtKB Keywords, Reactome, and Kyoto Encyclopedia of Genes and Genomes (KEGG) databases (analysed by stringApp within the Cytoscape framework).

| Bioinformatic term                                | Total genes | Percent from differentially expressed genes | Background genes | FDR-corrected <i>p</i> value |
|---------------------------------------------------|-------------|---------------------------------------------|------------------|------------------------------|
| Cell junction (GO CC)                             | 109         | 5,15%                                       | 2115             | $2.80 \times 10^{-12}$       |
| Anchoring junction (GO CC)                        | 63          | 4,75%                                       | 1325             | $1.72 \times 10^{-5}$        |
| Cell adhesion (GO BP)                             | 58          | 6,01%                                       | 965              | $2.39 \times 10^{-8}$        |
| Positive regulation of cell adhesion (GO BP)      | 51          | 10,52%                                      | 485              | $2.18 \times 10^{-15}$       |
| Positive regulation of cell-cell adhesion (GO BP) | 36          | 11,18%                                      | 322              | $2.16 \times 10^{-11}$       |

|                                                                 |    |        |     |                        |
|-----------------------------------------------------------------|----|--------|-----|------------------------|
| Focal adhesion (KEGG)                                           | 29 | 14,87% | 195 | $6.45 \times 10^{-12}$ |
| Angiogenesis (GO BP)                                            | 24 | 7,38%  | 325 | $9.83 \times 10^{-5}$  |
| Cell-substrate junction (GO CC)                                 | 24 | 5,63%  | 426 | $4.40 \times 10^{-3}$  |
| Cell-cell junction (GO CC)                                      | 24 | 4,81%  | 499 | $2.59 \times 10^{-2}$  |
| Cell junction assembly (GO BP)                                  | 20 | 7,33%  | 273 | $6.10 \times 10^{-4}$  |
| Cell-substrate adhesion (GO BP)                                 | 17 | 8,72%  | 195 | $3.50 \times 10^{-4}$  |
| Cell-matrix adhesion (GO BP)                                    | 14 | 10,29% | 136 | $3.90 \times 10^{-4}$  |
| Positive regulation of angiogenesis (GO BP)                     | 14 | 8,43%  | 166 | $2.20 \times 10^{-3}$  |
| Signaling by NOTCH (Reactome)                                   | 13 | 6,37%  | 204 | $2.70 \times 10^{-2}$  |
| Gap junction (KEGG)                                             | 11 | 12,64% | 87  | $1.80 \times 10^{-4}$  |
| Basement membrane (GO CC)                                       | 11 | 11,22% | 98  | $1.90 \times 10^{-3}$  |
| Endothelium development (GO BP)                                 | 10 | 10,20% | 98  | $4.90 \times 10^{-3}$  |
| Nitric oxide stimulates guanylate cyclase (Reactome)            | 8  | 36,36% | 22  | $2.42 \times 10^{-5}$  |
| Signaling by NOTCH4 (Reactome)                                  | 8  | 9,88%  | 81  | $1.93 \times 10^{-2}$  |
| Endothelial cell differentiation (GO BP)                        | 8  | 9,76%  | 82  | $2.02 \times 10^{-2}$  |
| Elastic fibre formation (Reactome)                              | 7  | 15,91% | 44  | $6.10 \times 10^{-3}$  |
| Molecules associated with elastic fibres (Reactome)             | 6  | 16,22% | 37  | $1.20 \times 10^{-2}$  |
| Sprouting angiogenesis (GO BP)                                  | 6  | 10,34% | 58  | $4.80 \times 10^{-2}$  |
| Regulation of nitric oxide mediated signal transduction (GO BP) | 4  | 40,00% | 10  | $5.50 \times 10^{-3}$  |
| Nitric oxide mediated signal transduction (GO BP)               | 4  | 19,05% | 21  | $3.60 \times 10^{-2}$  |

**Supplementary Table S40.** Sequences of primers used for RT-qPCR.

| Gene         | Forward primer               | Reverse primer                  |
|--------------|------------------------------|---------------------------------|
| <i>VCAM1</i> | 5'-CGTCTTGGTCAGCCCTTCCT-3'   | 5'-ACATTCATATACTCCCGCATCCTTC-3' |
| <i>ICAM1</i> | 5'-TTGGGCATAGAGACCCCGTT-3'   | 5'-GCACATTGCTCAGTTCATACACC-3'   |
| <i>SELE</i>  | 5'-ACCCTGGCTTCAGTGGACTC-3'   | 5'-TGCTTGGCAGGTAACCCCTAT-3'     |
| <i>SELP</i>  | 5'-ATGGGTGGGAACCAAAAAGG-3'   | 5'-GGCTGACGGACTCTTGATGTAT-3'    |
| <i>IL6</i>   | 5'-GGCACTGGCAGAAAACAACC-3'   | 5'-GCAAGTCTCCTCATTGAATCC-3'     |
| <i>CXCL8</i> | 5'-CAGAGACAGCAGAGCACAC-3'    | 5'-AGTTCTTTAGCACTCCTTGGC-3'     |
| <i>CCL2</i>  | 5'-TTCTGTGCCCTGCTGCTCATAG-3' | 5'-AGGTGACTGGGGCATTGATTG-3'     |
| <i>CXCL1</i> | 5'-GCTTGCCTCAATCCTGCATCC-3'  | 5'-ACAATCCAGGTGGCCTCTGC-3'      |

|               |                               |                              |
|---------------|-------------------------------|------------------------------|
| <i>MIF</i>    | 5'-GGTGTCCGAGAAGTCAGGCA-3'    | 5'-GGGGCACGTTGGTGTTTACG-3'   |
| <i>KLF2</i>   | 5'-CAGCACTGGTCTGGTTGCTTG-3'   | 5'-ACCCACTGCACACGATGCTT-3'   |
| <i>KLF4</i>   | 5'-GAAAAGGACCGCCACCCACA-3'    | 5'-AGCGGGCGAATTTCCATCCA-3'   |
| <i>NFE2L2</i> | 5'-GCACATCCAGTCAGAAACCAGT-3'  | 5'-ACTGAAACGTAGCCGAAGAAAC-3' |
| <i>SNAI1</i>  | 5'-CAGACCCACTCAGATGTCAAGAA-3' | 5'-GGGCAGGTATGGAGAGGAAGA-3'  |
| <i>SNAI2</i>  | 5'-ACTCCGAAGCCAAATGACAA-3'    | 5'-CTCTCTCTGTGGGTGTGTGT-3'   |
| <i>TWIST1</i> | 5'-GTCCGCAGTCTTACGAGGAG-3'    | 5'-GCTTGAGGGTCTGAATCTTGCT-3' |
| <i>ZEB1</i>   | 5'-GATGATGAATGCGAGTCAGATGC-3' | 5'-ACAGCAGTGTCTTGTTGTTGT-3'  |
| <i>CDH5</i>   | 5'-AAGCGTGAGTCGCAAGAATG-3'    | 5'-TCTCCAGGTTTTCGCCAGTG-3'   |
| <i>CDH2</i>   | 5'-GCTTCTGGTGAAATCGCATT-3'    | 5'-AGTCTCTCTTCTGCCTTTGTAG-3' |
| <i>NOS3</i>   | 5'-CCCGTTATCCCAGCTCCAAT-3'    | 5'-GTTGATGGCTTGACGTGCGTA-3'  |
| <i>GAPDH</i>  | 5'-AGCCACATCGCTCAGACAC-3'     | 5'-GCCCAATACGACCAAATCC-3'    |
| <i>ACTB</i>   | 5'-CATCGAGCACGGCATCGTCA-3'    | 5'-TAGCACAGCCTGGACAGCAAC-3'  |
| <i>B2M</i>    | 5'-TCCATCCGACATTGAAGTTG-3'    | 5'-CGGCAGGCATACTCATCTT-3'    |
