# Supplementary material for: Multi-Omics Profiling of Human Endothelial Cells from the Coronary Artery and Internal Thoracic Artery Reveals Molecular but Not Functional Heterogeneity
Source: Int J Mol Sci. 2023 Oct 9;24(19):15032. doi: 10.3390/ijms241915032 (PMC10573276; doi:10.3390/ijms241915032)
Supplement: Supplementary file 1 [file ijms-24-15032-s001.zip]

Archive with 5 entries (5 files):
- Legend to Supplementary Figure S1.pdf
- Legend to Supplementary Figure S2.pdf
- Legend to Supplementary Figure S3.pdf
- Legend to Supplementary Figure S4.pdf
- Supplementary Tables (S1-S40).pdf
